# Supplementary material
Source: publisher site journal article supplement (https://static.cambridge.org/content/id/urn:cambridge.org:id:article:S1047951122001433/resource/name/S1047951122001433supp001.docx)
Supplement: Supplementary file 1 [file S1047951122001433supp001.docx]

**References (Electronics)**

E1. Maurer MS, King DL, El-Khoury Rumbarger L, Packer M, Burkhoff D. Left heart failure with a normal ejection fraction: identification of different pathophysiologic mechanisms. J Card Fail 2005; 11: 177-187.E73.

E2. Ohuchi H, **Has**egawa S, Yasuda K, Yamada O, Ono Y, Echigo S. Severely impaired cardiac autonomic nervous activity after the Fontan operation. Circulation 2001; 104: 1513-1518.

E3. Elder RW, Parekh S, Book WM. More on hepatocellular carcinoma after the Fontan procedure. N Engl J Med 2013; 369: 490.

E4. Chaloupecky V, Svobodova I, Hadacova I, et al. Coagulation profile and liver function in 102 patients after total cavopulmonary connection at mid term follow up. Heart 2005; 91: 73-9.

E5. Devictor D, Tahiri C, Rousset A, et al. Management of fulminant hepatic failure in children-an analysis of 56 cases. Crit Care Med 1993; 21(Suppl): 348 -9.

E6. van Nieuwenhuizen RC, Peters M, Lubbers LJ, et al. Abnormalities in liver function and coagulation profile following the Fontan procedure. Heart 1999; 82: 40-6.

E7. Mack CL, Superina RA, Whitington PF. Surgical restoration of portal flow corrects procoagulant and anticoagulant deficiencies associated with extrahepatic portal vein thrombosis. J Pediatr 2003; 142: 197-9.

E8. Superina R, Rambini DA, Lokar J, et al. Correction of extrahepatic portal vein thrombosis by the mesenteric to left portal vein bypass. Ann Surg 2006; 243: 515-21.

E9. Narkewicz M, Sondheimer HM, Ziegler JW, et al. Hepatic dysfunction following the Fontan procedure. J Pediatr Gastroenterol Nutr 2003; 36: 352-7.

E10. Kim MS, Kato TS, Farr M, et al. Hepatic dysfunction in ambulatory patients with heart failure: application of the MELD scoring system for outcome prediction. J Am Coll Cardiol. 2013; 61: 2253-2261.

E11. Rhodes J, Ubeda-Tikkanen A, Clair M, et al. Effect of inhaled iloprost on the exercise function of Fontan patients: a demonstration of concept. Int J Cardiol 2013; 168: 2435-2440.

E12. van den Bosch AE, Roos-Hesselink JW, van Domburg R, et al. Long-term outcome and quality of life in adult patients after the Fontan operation. Am J Cardiol 2004; 93: 1141e5.

E13. Nurnberg JH, Ovroutski S, Alexi-Meskishvili V, et al. New onset arrhythmias after the extracardiac conduit Fontan operation compared with the intraatrial lateral tunnel procedure: Early and midterm results. Ann Thorac Surg 2004; 78: 1979-88.

E14. Stamm C, Friehs I, Mayer JE Jr, et al. Long-term results of the lateral tunnel Fontan operation. J Thorac Cardiovasc Surg 2001; 121: 28e41.

E15. Ono M, Boethig D, Goerler H, et al. Clinical outcome of patients 20 years after Fontan operation--effect of fenestration on late morbidity. Eur J Cardiothorac Surg 2006; 30: 923-9.

E16. Miyazaki A, Sakaguchi H, Ohuchi H, et al. The clinical course and incidence of supraventricular tachyarrhythmias after extra-cardiac conduit Fontan procedures in relation to an atrial situs. Circ J 2011; 75: 413-20.

E17. Chowdhury UK, Airan B, Subramaniam G, et al. Specific issues after extracardiac Fontan operation at mid-term follow up. Systemic ventricular function, growth potential, arrhythmia and thromboembolism. Ann Thorac Surg 2005; 80: 665-72.

E18. Giannakoulas G, Dimopoulos K, Yuksel S, et al. Atrial tachyarrhythmias late after Fontan operation are related to increase in mortality and hospitalization. Int J Cardiol 2010 Dec 31.

E19. de Groot N, Zeppenfeld K, Wijffels MC, et al. Ablation of focal atrial arrhythmia in patients with congenital heart defects after surgery: role of circumscribed areas with heterogeneous conduction. Heart Rhythm 2006; 3: 526-35.

E20. **Fishberger SB, Wernovsky G, Genteles TL, et al. Factors that influence the development of atrial flutter after the Fontan operation. J Thorac Cardiovasc Surg 1997; 113: 80-6.**

E21. Azakie A, McCrindle BW, van Arsdell G, et al. Extracardiac conduit versus lateral tunnel cavopulmonary connections at a single institution: impact on outcomes. J Thorac Cardiovasc Surg 2001; 122: 1219-28.

E22. d'Udekem Y, Cheung MM, Setyapranata S, et al. How good is a good Fontan? Quality of life and exercise capacity of Fontans without arrhythmias. Ann Thorac Surg 2009; 88: 1961-9.

E23. Kalman JM, VanHare GF, Olgin JE, et al. Ablation of “incisional” reentrant atrial tachycardia complicating surgery for congenital heart disease. Use of entrainment to define a critical isthmus of conduction. Circulation 1996; 93: 502-512.

E24. Weipert J, Noebauer C, Schreiber C, et al. Occurrence and management of atrial arrhythmia after long-term Fontan circulation. J Thorac Cardiovasc Surg 2004; 127: 457-464.

E25. de Groot N, Zeppenfeld K, Wijffels MC, et al. Ablation of focal atrial arrhythmia in patients with congenital heart defects after surgery: role of circumscribed areas with heterogeneous conduction. Heart Rhythm 2006; 3: 526-35.

E26. Yap SC, Harris L, Silversides CK, et al. Outcome of intra-atrial re-entrant tachycardia catheter ablation in adults with congenital heart disease: negative impact of age and complex atrial surgery. J Am Coll Cardiol 2010; 56: 1589-1596.

E27. Quinton E, Nightingale P, Hudsmith L, et al. Prevalence of atrial tachyarrhythmia in adults after Fontan operation. Heart 2015; 101: 1672-1677.

E28. Walsh EP. Interventional electrophysiology in patients with congenital heart disease. Circulation. 2007; 115: 3224-3234.

E29. Balaji S, Case CL, Sade RM, et al. Arrhythmias and electrocardiographic changes after the hemi-Fontan procedure. Am J Cardiol 1994; 73: 828-829.

E30. Laschinger JC, Ringel RE, Brenner JI, et al. The extracardiac total cavopulmonary connection for definitive conversion to the Fontan circulation: summary of early experience and results. J Card Surg 1993; 8: 524-533.

E31. Kreutzer J, Keane JF, Lock JE, Walsh EP, Jonas RA, Castaneda AR, et al. Conversion of modified Fontan procedure to lateral atrial tunnel cavopulmonary anastomosis. J Thorac Cardiovasc Surg 1996; 111: 1169-76.

E32. Ninan M, Myers JL. Conversion of the atriopulmonary Fontan connection to a total cavopulmonary connection. Semin Thorac Cardiovasc Surg Pediatr Card Surg Annu 1998; 1: 23-30.

E33. Van Son JA, Reddy M, Hanley FL. Extracardiac modification of the Fontan operation without use of prosthetic material. J Thorac Cardiovasc Surg 1995; 110: 1766-8.

E34. Ono M, Boethig D, Goerler H, et al. Clinical outcome of patients 20 years after Fontan operation--effect of fenestration on late morbidity. Eur J Cardiothorac Surg 2006; 30: 923-9.

E35. Stephenson EA, Lu M, Berul CI, et al. Arrhythmias in a contemporary Fontan cohort: prevalence and clinical associations in a multicenter cross-sectional study. J Am Coll Cardiol 2010; 56: 890-6.

E36. Nakamura Y, Yagihara T, Kagisaki K, et al. Ventricular performance in long-term survivors after Fontan operation. Ann Thorac Surg 2011; 91: 172e80.

E37. Fraser Jr CD. Management of systemic outlet obstruction in patients undergoing single ventricle palliation. Semin Thorac Cardiovasc Surg Pediatr Card Surg Annu. 2009; 12: 70-75.

E38. Mosca RS, Hennein HA, Kulik TJ, et al. Modified Norwood operation for single left ventricle and ventriculoarterial discordance: an improved surgical technique. Ann Thorac Surg. 1997; 64: 1126-1132.

E39. Kwak JG, Park CS, Lee CH, et al. Early surgical correction of atrioventricular valvular regurgitation in single-ventricle patients. Ann Thorac Surg. 2010; 90: 1320-1323.

E40. Odegard KC, McGowan FX Jr, Zurakowski D, et al. Procoagulant and anticoagulant factor abnormalities following the Fontan procedure: increased factor VIII may predispose to thrombosis. J Thorac Cardiovasc Surg 2003; 125: 1260-7.

E41. Tomita H, Yamada O, Ohuchi H, Ono Y, Arakaki Y, Yagihara T, et al. Coagulation profile, hepatic function, and hemodynamics following Fontan-type operations. Cardiol Young 2001; 11: 62-6.

E42. Monage P, Cochrane A, Roberts R, et al. A multicenter, randomized trial comparing heparin/warfarin and acetylsalicylic acid as primary thromboprophylaxis for 2 years after the Fontan procedure in children. J Am Coll Cardiol 2011; 58: 645-651.

E43. Rosenthal DN, Friedman AH, Kleinman CS, et al. Thromboembolic complications after Fontan operations. Circulation. 1995; 92: II287-II293

E44. Szwast A, Tian Z, McCann M, et al. Right ventricular performance in the fetus with hypoplastic left heart syndrome. Ann Thorac Surg. 2009; 87: 1214-1219.

E45. **Mahle WT, Wang A, Quyyumi AA, McConnell ME, Book WM. Impact of spironolactone on endothelial function in patients with single ventricle heart. Congenital Heart Dis. 2009; 4: 12-16.**

E46. Gewillig M, Brown SC, Eyskens B, et al. The Fontan circulation: who controls cardiac output? Interact Cardiovasc Thorac Surg 2010; 10: 428-433.

E47. Kimball TR, Witt SA, Khoury PR, et al. Automated echocardiographic analysis of systemic ventricular performance in hypoplastic left heart syndrome. J Am Soc Echocardiogr 1996; 9: 629-636.

E48. Marino BS. Outcomes after the Fontan procedure. Curr Opin Pediatr. 2002; 14: 620-626.

E49. Border WL, Syed AU, Michelfelder EC, et al. Impaired systemic ventricular relaxation affects postoperative short-term outcome in Fontan patients. J Thorac Cardiovasc Surg 2003; 126: 1760-1764.

E50. Vitarelli A, Conde Y, Cimino E, et al. Quantitative assessment of systolic and diastolic ventricular function with tissue Doppler imaging after Fontan type of operation. Int J Cardiol 2005; 102: 61-69.

E51. Margossian R, Schwartz ML, Prakash A, et al. Comparison of echocardiographic and cardiac magnetic resonance imaging measurements of functional single ventricular volumes, mass, and ejection fraction (from the Pediatric Heart Network Fontan Cross-Sectional Study). Am J Cardiol 2009; 104: 419-428.

E52. Ghanayem NS, Berger S, Tweddell JS. Medical management of the failing Fontan. Pediatr Cardiol. 2007; 28: 465-471.

E53. Dodge-Khatami A, Rahn M, Pretre R, et al. Dual chamber epicardial pacing for the failing atriopulmonary Fontan patient. Ann Thorac Surg. 2005; 80: 1440-1444.

E54. Cohen MS, Zak V, Atz AM, Printz BF, Pinto N, Lambert L, Pemberton V, Li JS, Margossian R, Dunbar-Masterson C, McCrindle BW. Anthropometric measures after Fontan procedure: implications for suboptimal functional outcome. Am Heart J. 2010; 160: 1092-1098.e1.

E55. Fernandes SM, Alexander ME, Graham DA, et al. Exercise testing identifies patients at increased risk for morbidity and mortality following Fontan surgery. Congenit Heart Dis 2011; 6: 294-303

E56. Anderson PAW, Sleeper LA, Mahony L, et al. Contemporary outcomes after the Fontan procedure. J Am Coll Cardiol 2008; 52: 85-98.

E57. Testani JM, Coca SG, Shannon RP, Kimmel SE, Cappola TP. Influence of renal dysfunction phenotype on mortality in the setting of cardiac dysfunction: analysis of three randomized controlled trials. Eur J Heart Fail. 2011; 13: 1224-1230.

E58. Salerno F, Navickis RJ, Wilkes MM. Albumin treatment regimen for type 1 hepatorenal syndrome: a dose-response meta-analysis. BMC Gastroenterol. 2015; 15: 167.

E59. **Pundi KN, Johnson JN, Dearani JA, et al. 40- year follow-up after the Fontan operation: long-term outcomes of 1,052 patients. J Am Coll Cardiol. 2015; 66: 1700-1710.**

E60. Kelley JR, Mack GW, Fahey JT. Diminished venous vascular capacitance in patients with univentricular hearts after the Fontan operation. Am J Cardiol. 1995; 76: 158-163.

E61. McRae ME. Long-term issues after the Fontan procedure. AACN Adv Crit Care. 2013; 24: 264-282.

E62. Bhatt AB, Landzberg MJ, Gerhard-Herman M, et al. Pathophysiology of chronic venous insufficiency in adults with a Fontan circulation (a predefined substudy of the CALF investigation). Int J Cardiol. 2013; 165: 41-45.

E63. Saiki H, Kurishima C, Masutani S, Senzaki H. Cerebral circulation in patients with Fontan circulation: assessment by carotid arterial wave intensity and stiffness. Ann Thorac Surg. 2014; 97: 1394-1399.

E64. Gaynor JW, Ittenbach RF, Gerdes M, et al. Neurodevelopmental outcomes in preschool survivors of the Fontan procedure. J Thorac Cardiovasc Surg. 2014; 147: 1276-1282.

E65. **Forbess JM, Visconti KJ, Bellinger DC, Jonas RA. Neurodevelopmental outcomes in children after the Fontan operation. Circulation. 2001; 104: 1127-1132.**

E66. Mair DD, Puga FJ, Danielson GK. Late functional status of survivors of the Fontan procedure performed during the 1970s. Circulation. 1992; 86: II106-II109.

E67. **Bellinger DC, Watson CG, Rivkin MJ, et al. Neuropsychological status and structural brain imaging in adolescents with single ventricle who underwent the Fontan procedure. J Am Heart Assoc. 2015; 4: e002302.**

E68. Watanabe J, Levine MJ, Bellotto F, Johnson RG, Grossman W. Effects of coronary venous pressure on left ventricular diastolic distensibility. Circ Res. 1990; 67: 923-932.

E69. Rydberg A, Wiklund U, Rask P, Hornstein R. Serial assessment of variability in heart rate in children with the Fontan circulation. Cardiol Young 2005; 15: 498-503.

E70. Rathod RH, Prakash A, Powell AJ, Geva T. Myocardial fibrosis identified by cardiac magnetic resonance late gadolinium enhancement is associated with adverse ventricular mechanics and ventricular tachycardia late after Fontan operation. J Am Coll Cardiol 2010; 55: 1721-8.

E71. Brown JW, Ruzmetov M, Deschner BW, et al. Lateral tunnel Fontan in the current era: is it still a good option? Ann Thorac Surg 2010; 89: 556-63.

E72. Azakie A, McCrindle BW, van Arsdell G, et al. Extracardiac conduit versus lateral tunnel cavopulmonary connections at a single institution: impact on outcomes. J Thorac Cardiovasc Surg 2001; 122: 1219-28.

E73. Osada Y, Kanazawa H, Narahara Y, Mamiya Y, Nakatsuka K, Sakamoto C. Wedged hepatic venous pressure does not reflect portal pressure in patients with cirrhosis and hepatic veno-venous communications. Dig Dis Sci. 2008; 53: 7-13.

E74. Dori Y, Zviman MM, Itkin M. Dynamic contrast-enhanced MR lymphangiography: feasibility study in swine. Radiology. 2014; 273: 410-416.

E75. Cordina RL, O'Meagher S, Karmali A, et al. Resistance training improves cardiac output, exercise capacity and tolerance to positive airway pressure in Fontan physiology. Int J Cardiol. 2013; 168: 780-788.

E76. Opocher F, Varnier M, Sanders SP, et al. Effects of aerobic exercise training in children after the Fontan operation. Am J Cardiol 2005; 95: 150-152.

E77. Brassard P, Bédard E, Jobin J, et al. Exercise capacity and impact of exercise training in patients after a Fontan procedure: a review. Can J Cardiol 2006; 22: 489-495.

E78. Cobden I, Shore A, Wilkinson R, Record CO. Captopril in the hepatorenal syndrome. J Clin Gastroenterol 1985; 7: 354-360.

E79. Barst RJ, Gibbs JS, Ghofrani HA, et al. Updated evidence-based treatment algorithm in pulmonary arterial hypertension. J Am Coll Cardiol. 2009; 54: S78-S84.

E80. Lata J. Hepatorenal syndrome. World J Gastroenterol. 2012; 18: 4978-4984.

E81. Maddukuri G, Cai CX, Munigala S, Mohammadi F, Zhang Z. Targeting an early and substantial increase in mean arterial pressure is critical in the management of type 1 hepatorenal syndrome: A combined retrospective and pilot study. Dig Dis Sci 2014; 59: 471-481.

E82. Ovaert C, Thijs D, Dewolf D, et al. The effect of bosentan in patients with a failing Fontan circulation. Cardiol Young. 2009; 19: 331-339.

E83. Schuuring MJ, Vis JC, van Dijk AP, et al. Impact of bosentan on exercise capacity in adults after the Fontan procedure: a randomized controlled trial. Eur J Heart Fail. 2013; 15: 690-698.

E84. Hebert A, Mikkelsen UR, Thilen U, et al. Bosentan improves exercise capacity in adolescents and adults after Fontan operation: the TEMPO (Treatment With Endothelin Receptor Antagonist in Fontan Patients, a Randomized, Placebo- Controlled, Double-Blind Study Measuring Peak Oxygen Consumption) study. Circulation. 2014; 130: 2021-2030.

E85. Snarr BS, Paridon SM, Rychik J, Goldberg DJ. Pulmonary vasodilator therapy in the failing Fontan circulation: rationale and efficacy. Cardiol Young. 2015; 25: 1489-1492.

E86. John AS, Driscoll DJ, Warnes CA, Phillips SD, Cetta F. The use of oral budesonide in adolescents and adults with protein-losing enteropathy after the Fontan operation. Ann Thorac Surg. 2011; 92: 1451-1456.

E87. **Uzark K, Zak V, Shrader P, et al. Assessment of quality of life in young patients with single ventricle after the Fontan operation. J Pediatr 2015; 170: 166-172.**

E88. Frazier OH, Gregoric ID, Messner GN. Total circulatory support with an LVAD in an adolescent with a previous Fontan procedure. Tex Heart Inst J 2005; 32: 402-404.

E89. Rodefeld MD, Coats B, Fisher T, et al. Cavopulmonary assist for the univentricular Fontan circulation: von Karman viscous impeller pump. J Thorac Cardiovasc Surg 2010; 140: 529-536.

E90. Cardarelli MG, Salim M, Love J, et al. Berlin heart as a bridge to recovery for a failing Fontan. Ann Thorac Surg 2009; 87: 943-946.

E91. Poh CL, Cochrane A, Galati JC, et al. Ten-year outcomes of Fontan conversion in Australia and New Zealand demonstrate the superiority of a strategy of early conversion. Eur J Cardiothorac Surg 2016; 49: 530-535.

E92. Dalton HJ, Siewers RD, Fuhrman BP, del Nido P, Thompson AE, S**have**r MG et al. Extracorporeal membrane oxygenation for cardiac rescue in children with severe myocardial dysfunction. Crit Care Med 1993; 21: 1020-8.

E93. Carey JA, Hamilton JR, Hilton CJ, Dark JH, Forty J, Parry G, et al. Orthotopic cardiac transplantation for the failing Fontan circulation. Eur J Cardiothorac Surg 1998; 14: 7-13.

E94. Bacha EA, Zimmerman FJ, Mor-Avi V, et al. Ventricular resynchronization by multisite pacing improves myocardial performance in the postoperative single-ventricle patient. Ann Thorac Surg 2004; 78: 1678-1683.

E95. Michielon G, Parisi F, Di Carlo D, Squitieri C, Carotti A, Buratta M, Di Donato RM. Orthotopic heart transplantation for failing single ventricle physiology. Eur J Cardiothorac Surg 2003; 24: 502-510.

E96. **Has**aniya NW, Razzouk AJ, Mulla NF, Larsen RL, Bailey LL. In situ pericardial extracardiac lateral tunnel Fontan operation: fifteen-year experience. J Thorac Cardiovasc Surg 2010; 140: 1076-83.

E97. Mondésert B, Marcotte F, Mongeon FP, et al. Fontan circulation: success or failure? Can J Cardiol 2013; 29: 811-20.

E98. Jayakumar KA, Addonizio LJ, Kichuk-Chrisant MR, Galantowicz ME, Lamour JM, Quaegebeur JM, et al. Cardiac transplantation after the Fontan or Glenn procedure. J Am Coll Cardiol 2004; 44: 2065-72.

E99. Bernstein D, Naftel D, Chin C, et al., Pediatric Heart Transplant Study. Outcome of listing for cardiac transplantation for failed Fontan: a multi-institutional study. Circulation 2006; 114: 273-80.

E100. Gamba A, Merlo M, Fiocchi R, Terzi A, Mammana C, Sebastiani R, Ferrazzi P. Heart transplantation in patients with previous Fontan operations. J Thorac Cardiovasc Surg 2004; 127: 555-562.

E101. Khambadkone S. The Fontan pathway: what’s down the road? Ann Pediatr Cardiol 2008; 1: 83-92.

E102. Kanter KR, Mahle WT, Vincent RN, et al. Heart transplantation in children with a Fontan procedure. Ann Thorac Surg 2011; 91: 823-9.

E103. Simmonds J, Burch M, Dawkins H, et al. Heart transplantation after congenital heart surgery: improving results and future goals. Eur J Cardiothorac Surg 2008; 34: 313-7.

E104. Salome CM, King GG, Berend N. Physiology of obesity and effects on lung function. J Appl Physiol 2010; 108: 206-11.

E105. Lacour-Gayet FG, Lanning CJ, Stoica S, et al. An artificial right ventricle for failing Fontan: in vitro and computational study. Ann Thorac Surg 2009; 88: 170-176.

E106. Throckmorton AL, Kapadia JY, Chopski SG, et al. Numerical, hydraulic, and hemolytic evaluation of an intravascular axial flow blood pump to mechanically support Fontan patients. Ann Biomed Eng 2011; 39: 324-336.

E107. Davies RR, Chen JM, Mosca RS. The Fontan procedure: evolution in technique: attendant imperfections and transplantation for "failure". Semin Thorac Cardiovasc Surg Pediatr Card Surg Annu 2011; 14: 55e66.

E108. Chen JM, Davies RR, Mital SR, et al. Trends and outcomes in transplantation for complex congenital heart disease: 1984 to 2004. Ann Thorac Surg 2004; 78: 1352-61.

E109. Murphy MO, Glatz AC, Goldberg DJ, et al. Management of early Fontan failure: A single-institution experience. Eur J Cardiothorac Surg 2014; 46: 458-64.

E110. Meyer DB, Zamora G, Wernovsky G, Ittenbach RF, Gallagher PR, Tabbutt S et al. Outcomes of the Fontan procedure using cardiopulmonary bypass with aortic cross-clamping. Ann Thorac Surg 2006; 82: 1611-8; discussion 1618-20.

E111. Hirsch JC, Goldberg C, Bove EL, Salehian S, Lee T, Ohye RG et al. Fontan operation in the current era. Trans Meet Am Surg Assoc 2008; 126: 52-60.

E112. Hirsch JC, Ohye RG, Devaney EJ, Goldberg CS, Bove EL. The lateral tunnel Fontan procedure for hypoplastic left heart syndrome: results of 100 consecutive patients. Pediatr Cardiol 2007; 28: 426-32.

E113. Bautista-Hernandez V, Scheurer M, Thiagarajan R, Salvin J, Pigula FA, Emani S et al. Right ventricle and tricuspid valve function at midterm after the Fontan operation for hypoplastic left heart syndrome: impact of shunt type. Pediatr Cardiol 2011; 32: 160-6.

E114. Ovroutski S, Ewert P, Alexi-Meskishvili V, et al. Dilatation and stenting of the Fontan pathway: impact of the stenosis treatment on chronic ascites. J Interv Cardiol 2008; 21: 38-43.

E115. Iyengar AJ, Winlaw DS, Galati JC, et al. Trends in Fontan surgery and risk factors for early adverse outcomes after Fontan surgery: the Australia and New Zealand Fontan Registry experience. J Thorac Cardiovasc Surg 2014; 148: 566-75.

E116. Robbers-Visser D, Miedema M, Nijveld A, Boersma E, Bogers AJJC, Haas F et al. Results of staged total cavopulmonary connection for functionally univentricular hearts; comparison of intra-atrial lateral tunnel and extracardiac conduit. Eur J Cardiothorac Surg 2010; 37: 934-41.

E117. Nathan M, Baird C, Fynn-Thompson F, et al. Successful implantation of a Berlin heart biventricular assist device in a failing single ventricle. J Thorac Cardiovasc Surg 2006; 131: 1407-1408.

E118. **Newcomb AE, Negri JC, Brizard CP, et al. Successful left ventricular assist device bridge to transplantation after failure of a Fontan revision. J Heart Lung Transplant 2006; 25: 365-367.**

E119. Sheikh AM, Tang AT, Roman K, et al. The failing Fontan circulation: successful conversion of atriopulmonary connections. J Thorac Cardiovasc Surg 2004; 128: 60-6.

E120. Uzun O, Wong JK, Bhole V, et al. Resolution of protein-losing enteropathy and normalization of mesenteric Doppler flow with sildenafil after Fontan. Ann Thorac Surg 2006; 82: e39-e40

E121. Goldberg D, Szwasat A, Marino B et al. Abstract 2161: Sildenafil improves ventricular performance in children and young adults after the Fontan operation. Circulation 2009; 120 (Suppl. 18), S603.

E122. Giardini A, Balducci A, Specchia S, Gargiulo G, Bonvicini M, Picchio FM. Effect of sildenafil on haemodynamic response to exercise and exercise capacity in Fontan patients. Eur Heart J 2008; 29: 1681-7.

E123. **Has**eyama K, Satomi G, Yasukochi S, et al. Pulmonary vasodilation therapy with sildenafil citrate in a patient with plastic bronchitis after the Fontan procedure for hypoplastic left heart syndrome. J Thorac Cardiovasc Surg 2006; 132: 1232-1233.

E124. Morchi GS, Ivy DD, Duster MC, et al. Sildenafil increases systemic saturation and reduces pulmonary artery pressure in patients with failing Fontan physiology. Congenit Heart Dis 2009; 4: 107-111.

E125. Reinhardt Z, Uzun O, Bhole V, et al. Sildenafil in the management of the failing Fontan circulation. Cardiol Young 2010; 20: 522-525.

E126. Van De Bruaene A, La Gerche A, Claessen G, et al. Sildenafil improves exercise hemodynamics in Fontan patients. Circ Cardiovasc Imaging 2014; 7: 265-273.

E127. Cedars AM, Saef J, Peterson LR, et al. Effect of Ambrisentan on exercise capacity in adult patients after the Fontan procedure. Am J Cardiol 2016; 117: 1524-1532.

E128. **Bowater SE, Weaver RA, Thorne SA, et al. The safety and effects of bosentan in patients with a Fontan circulation. Congenital Heart Dis 2012; 7: 243-249.**

E129. Kim YH, Chae MH, Choi DY. Inhaled iloprost for the treatment of patient with Fontan circulation. Korean J Pediatr 2014; 57: 461-463.

E130. Hjortdal VE, Christensen TD, Larsen SH, et al. Caval blood flow during supine exercise in normal and Fontan patients. Ann Thorac Surg 2008; 85: 599-603.

E131. Fogel MA. Cardiac magnetic resonance of single ventricles. J Cardiovasc Magn Reson 2006; 8: 661-670.

E132. Fogel MA, Hubbard A, Weinberg PM. A simplified approach for assessment of intracardiac baffles and extracardiac conduits in congenital heart surgery with two- and three-dimensional magnetic resonance imaging. Am Heart J 2001; 142: 1028-1036.

E133. Kaulitz R, Ziemer G, Paul T, et al. Fontan-type procedures: residual lesions and late interventions. Ann Thorac Surg 2002; 74: 778-785.

E134. Bédard E, Lopez S, Perron J, et al. Life-threatening hemoptysis following the Fontan procedure. Can J Cardiol 2008; 24: 145-147.

E135. Clift P, Celermajer D. Managing adult Fontan patients: Where do we stand? DOI: 10.1183/16000617.0091-2016

E136. Fredenburg TB, Johnson TR, Cohen MD. The Fontan procedure: Anatomy, complications, and manifestations of failure. RadioGraphics 2011; 31: 453-463.

E137. Sugiyama H, Yoo SJ, Williams W, et al. Characterization and treatment of systemic venous to pulmonary venous collaterals seen after the Fontan operation. Cardiol Young 2003; 13: 424-430.

E138. Poterucha JT, Johnson JN, Taggart NW, et al. Embolization of veno-venous collaterals after the Fontan operation is associated with decreased survival. Congenit Heart Dis 2015; 10: E230-E236.

E139. Stewart RD, Pasquali SK, Jacobs JP, Benjamin DK, Jaggers J, Cheng J et al. Contemporary Fontan operation: association between early outcome and type of cavopulmonary connection. Ann Thorac Surg 2012; 93: 1254-60; discussion 1261.

E140. Tweddell JS, Nersesian M, Mussatto KA, Nugent M, Simpson P, Mitchell ME et al. Fontan palliation in the modern era: factors impacting mortality and morbidity. Ann Thorac Surg 2009; 88: 1291-9.

E141. Petrossian E, Reddy VM, Collins KK, Culbertson CB, MacDonald MJ, Lamberti JJ et al. The extracardiac conduit Fontan operation using minimal approach extracorporeal circulation: early and midterm outcomes. J Thorac Cardiovasc Surg 2006; 132: 1054-63.

E142. Jacobs ML, Pelletier GJ, Pourmoghadam KK, Mesia CI, Madan N, Stern H et al. Protocols associated with no mortality in 100 consecutive Fontan procedures. Eur J Cardiothorac Surg 2008; 33: 626-32.

E143. Almond CS, Morales DL, Blackstone EH, et al. Berlin Heart EXCOR pediatric ventricular assist device for bridge to heart transplantation in US children. Circulation 2013; 127: 1702-11.

E144. Rogers LS, Glatz AC, Ravishankar C, Spray TL, Nicolson SC, Rychik J et al. 18 years of the Fontan operation at a single institution: results from 771 consecutive patients. J Am Coll Cardiol 2012; 60: 1018-25.

E145. Hosein RBM, Clarke AJB, McGuirk SP, Griselli M, Stumper O, De Giovanni JV et al. Factors influencing early and late outcome following the Fontan procedure in the current era. The ‘Two Commandments’? Eur J Cardiothorac Surg 2007; 31: 344-52; discussion 353.

E146. Lamberti JJ, Mainwaring RD, Spicer RL, et al. Factors influencing perioperative morbidity during palliation of the univentricular heart. Ann Thorac Surg 1995; 60 Suppl: S550 -S553.

E147. Marcelletti C, Corno A, Giannico S, Marino B. Inferior vena cavapulmonary artery extracardiac conduit. A new form of right heart bypass. J Thorac Cardiovasc Surg 1990; 100: 228-32.

E148. Giannico S, Iorio FS, Carotti A, Marcelletti C. Staging toward the Fontan operation. Semin Thorac Cardiovasc Surg 1994; 6: 13-6.

E149. Greenway SC, Crossland DS, Hudson M, et al. Fontan-associated liver disease: implications for heart transplantation. J Heart Lung Transplant 2016; 35: 26-33.

E150. Shi WY, Yong MS, McGiffin DC, et al. Heart transplantation in Fontan patients across Australia and New Zealand. Heart 2016; 102: 1120-1126.

E151. Iglarz M, Binkert C, Morrison K, Fischli W, Gatfield J, Treiber A, et al. Pharmacology of macitentan, an orally active tissue-targeting dual endothelin receptor antagonist. J Pharmacol Exper Therapeutics 2008; 327: 736-45.

E152. Gatfield J, Grandjean CM, Sasse T, Clozel M, Nayler O. Slow receptor dissociation kinetics differentiate macitentan from other endothelin receptor antagonists in pulmonary arterial smooth muscle cells. PLoS ONE 2012; 7: e47662.

E153. Cowburn PJ, Cleland JG, McArthur JD, MacLean MR, McMurray JJ, Dargie HJ, et al. Endothelin-B receptors are functionally important in mediating vasoconstriction in systemic circulation in patients with left ventricular systolic dysfunction. J Am Coll Cardiol 1999; 33: 932-8.

E154. Buckley MS, Staib RL, Wicks LM. Combination therapy in the management of pulmonary arterial hypertension. Int J Clin Pract Suppl 2013; 179: 13-23.

E155. Tsang W, Johansson B, Salehian O, et al. Intracardiac thrombus in adults with the Fontan circulation. Cardiol Young 2007; 17: 646-651.

E156. Rychik J. Forty years of the Fontan operation: a failed strategy. Semin Thorac Cardiovasc Surg 2010; 13(1): 96-100.

E157. Firdouse M, Agarwal A, Chan AK, Mondal T. Thrombosis and thromboembolic complications in Fontan patients: A literature review. Clinical and Applied Thrombosis/Hemostasis 2014; 20(5): 484-492.

E158. **Cheung YF, Penny DJ, Redington AN: Serial assessment of left ventricular diastolic function after Fontan procedure. Heart 2000; 83: 420-424,.**

E159. Mahnke CB, Boyle GJ, Janosky JE, et al. Anticoagulation and incidence of late cerebrovascular accidents following the Fontan procedure. Pediatr Cardiol 2005; 26: 56-61.

E160. Potter BJ, Leong-Sit P, Fernandes SM, et al. Effect of aspirin and warfarin therapy on thromboembolic events in patients with univentricular hearts and Fontan palliation. Int J Cardiol 2013; 168: 3940-3943.

E161. Monagle P, Karl TR. Thromboembolic problems after the Fontan operation. Semin Thorac Cardiovasc Surg Pediatr Card Surg Annu 2002; 5: 36-47.

E162. Zentner D, Kotevski A, King I, et al. Fertility and pregnancy in the Fontan population. Int J Cardiol 2016; 208: 97-101.

E163. Gouton M, Nizard J, Patel M, et al. Maternal and fetal outcomes of pregnancy with Fontan circulation: a multicentric observational study. Int J Cardiol 2015; 187: 84-89.

E164. Chugh R. Management of pregnancy in women with repaired CHD or after the Fontan procedure. Curr Treat Options Cardiovasc Med 2013; 15: 646-662.

E165. Canobbio MM, Mair DD, van der Velde M, et al. Pregnancy outcomes after the Fontan repair. J Am Coll Cardiol 1996; 28: 763-767.

E166. Drenthen W, Pieper PG, Roos-Hesselink JW, et al. Pregnancy and delivery in women after Fontan palliation Heart 2006; 92: 1290-1294.

E167. Hoare JV, Radford D. Pregnancy after Fontan repair of complex congenital heart disease. Aust NZ J Obstet Gynaecol 2001; 41: 464-468.

E168. Kim SY, Cho S, Choi E, et al. Pregnancy and delivery in functional single ventricle patient; successful long-term outcome after right ventricle exclusion and Fontan operation. Korean Circ J 2016; 46: 111-114.

E169. Pundi KN, Pundi K, Johnson JN, et al. Contraception practices and pregnancy outcome in patients after Fontan operation. Congenit Heart Dis 2016; 11: 63-70.

E170. Thacker D, Patel A, Dodds K, et al. Use of oral budesonide in the management of protein-losing enteropathy after the Fontan operation. Ann Thorac Surg 2010; 89: 837-842.

E171. Bhagirath KM, Tam JW. Resolution of protein-losing enteropathy with low-molecular weight heparin in an adult patient with Fontan palliation. Ann Thorac Surg 2007; 84: 2110-2112.

E172. Ringel RE, Peddy SB. Effect of high-dose spironolactone on protein-losing enteropathy in patients with Fontan palliation of complex congenital heart disease. Am J Cardiol 2003; 91: 1031-1032.

E173. Okano S, Sugimoto M, Takase M, et al. Effectiveness of high-dose spironolactone therapy in a patient with recurrent protein-losing enteropathy after the Fontan procedure. Intern Med 2016; 55: 1611-1614.

E174. Windram JD, Clift PF, Speakman J, et al. An unusual treatment for protein losing enteropathy. Congenit Heart Dis 2011; 6: 253-256.

E175. Wilson TG, Iyengar AJ, Winlaw DS, et al. Use of ACE inhibitors in Fontan: rational or irrational? Int J Cardiol 2016; 210: 95-99.

E176. Satomi G, Yasukochi S, Harada Y, et al. Effect of percutaneous fenestration of the atrial septum on protein-losing enteropathy after the Fontan operation. Heart 1996; 76: 90-91.

E177. António M, Gordo A, Pereira C, et al. Thoracic duct decompression for protein-losing enteropathy in failing Fontan circulation. Ann Thorac Surg 2016; 101: 2370-2373.

E178. Horai T, Bhama JK, Fontes PA, et al. Combined heart and liver transplantation in a patient with situs ambiguous. Ann Thorac Surg 2011; 91: 600-1.

E179. Marcelletti CF, Hanley FL, Mavroudis C, et al. Revision of previous Fontan connections to total extracardiac cavopulmonary anastomosis: A multicenter experience. J Thorac Cardiovasc Surg 2000; 119: 340-346.

E180. Registry for the International Society for Heart and Lung Transplantation: Seventh Official Pediatric Report-2004. J Heart Lung Transplantation 2004; 23: 933- 47.

E181. Do P, Randhawa I, Chin T, et al. Successful management of plastic bronchitis in a child post Fontan: case report and literature review. Lung 2012; 190: 463-468.

E182. Zaccagni HJ, Kirchner L, Brownlee J, Bloom K. A case of plastic bronchitis presenting 9 years after Fontan. Pediatr Cardiol 2008; 29: 157-159.

E183. Buratto E, Ye XT, Konstantinov IG, et al. Scorpions, snakes, and Fontan failure: The dawn of a new ERA? J Thorac Cardiovasc Surg 2017; 153: 1476-8.

E184. John AS, Johnson JA, Khan M, et al. Clinical outcomes and improved survival in patients with protein-losing enteropathy after the Fontan operation. J Am Coll Cardiol 2014; 64: 54-62.

E185. Agnoletti G, Gala S, Ferroni F, et al. Endothelin inhibitors lower pulmonary vascular resistances and improve functional capacity in patients with Fontan Circulation. J Thorac Cardiovasc Surg 2017; 153: 1468-75.

E186. Knott-Craig CJ, Danielson GK, Schaff HV, et al. The modified Fontan operation. An analysis of risk factors for early postoperative death or takedown in 702 consecutive patients from one institution. J Thorac Cardiovasc Surg 1995; 109: 1237-43.

E187. d’Udekem Y, Iyengar AJ, Cochrane AD, et al. The Fontan procedure: contemporary techniques **have** improved long-term outcomes. Circulation 2007; 116: 1157-64.

E188. d’Udekem Y, Iyengar AJ, Galati JC, et al. Redefining expectations of long-term survival after the Fontan procedure: twenty-five years of follow-up from the entire population of Australia and New Zealand. Circulation 2014; 130: S32-S38.

E189. Crupi G, Locatelli G, Tiraboschi R, et al. Protein-losing enteropathy after Fontan operation for tricuspid atresia (imperforate tricuspid valve). Thorac Cardiovasc Surg 1980; 28: 359-363.

E190. Thorne SA, Barnes I, Cullinan P, et al. Amiodarone-associated thyroid dysfunction: risk factors in adults with congenital heart disease. Circulation 1999; 100: 149-154.

E191. Park HK, Shin HJ, Park YH. Outcomes of Fontan conversion for failing Fontan circulation: Mid-term results. Interactive Cardiovascular and Thoracic Surgery 2016; 23: 14-17.

E192. Hug MI, Ersch J, Moenkhoff M, et al. Chylous bronchial casts after Fontan operation. Circulation 2001; 103(7): 1031-1033.

E193. Mitchell MB, Campbell DN, Ivy D, et al. Evidence of pulmonary vascular disease after heart transplantation for Fontan circulation failure. J Thorac Cardiovasc Surg 2004; 128: 693-702.

E194. Ridderbos FJ, Wolff D, Timmer A, et al. Adverse pulmonary vascular remodeling in the Fontan circulation. J Heart Lung Transplant. 2015; 34: 404-413.

E195. Redington AN, Penny D, Shinebourne EA. Pulmonary blood flow after total cavopulmonary shunt. Br Heart J. 1991; 65: 213-217.

E196. Jahangiri M, Shore D, Kakkar V, et al. Coagulation factor abnormalities after the Fontan procedure and its modifications. J Thorac Cardiovasc Surg 1997; 113: 989-92.

E197. Laine GA, Allen SJ, Katz J, et al. Effect of systemic venous pressure elevation on lymph flow and lung edema formation. J Appl Physiol 1986; 61: 1634-1638.

E198. Lévy M, Danel C, Tamisier D, et al. Histomorphometric analysis of pulmonary vessels in single ventricle for better selection of patients for the Fontan operation. J Thorac Cardiovasc Surg 2002; 123: 263-270.

E199. Maeda K, Yamaki S, Kado H, et al. Reevaluation of histomorphometric analysis of lung tissue in decision making for better patient selection for Fontan-type operations. Ann Thorac Surg 2004; 78: 1371-1381.

E200. Chowdhury UK, Govindappa R, Ray R, Kalaivani M. Histomorphometric analysis of intrapulmonary vessels in patients undergoing bi-directional glenn and total cavopulmonary connection. J Thorac Cardiovasc Surg 2010; 140: 1251-6.

E201. Henaine R, Vergnat M, Bacha EA, et al. Effects of lack of pulsatility on pulmonary endothelial function in the Fontan circulation. J Thorac Cardiovasc Surg 2013; 146: 522-9.

E202. Aldenkortt F, Aldenkortt M, Caviezel L, et al. Portopulmonary hypertension and hepatopulmonary syndrome. World J Gastroenterol 2014; 20: 8072-8081.

E203. Cloutier A, Ash JM, Smallhorn JF, et al. Abnormal distribution of pulmonary blood flow after the Glenn shunt or Fontan procedure: risk of development of arteriovenous fistulae. Circulation 1985; 72: 471-479.

E204. Penny D, Shinebourne EA. Pulmonary blood flow after total cavopulmonary shunt. Br Heart J 1991; 65: 213-217.

E205. Asrani SK, Warnes CA, Kamath PS. Hepatocellular carcinoma after the Fontan procedure. N Engl J Med 2013; 368: 1756-1757.

E206. Kiesewetter CH, Sheron N, Vettukattill JJ, et al. Hepatic changes in the failing Fontan circulation. Heart 2007; 93: 579-84.

E207. Kendall TJ, Stedman B, Hacking N, et al. Hepatic fibrosis and cirrhosis in the Fontan circulation: a detailed morphological study. J Clin Pathol 2008; 61: 504-508.

E208. Saliba T, Dorkhom S, O’Reilly EM, et al. Hepatocellular carcinoma in two patients with cardiac cirrhosis. Eur J Gastroenterol Hepatol 2010; 22: 889-891.

E209. Kaulitz R, Ziemer G, Rauch R, et al. Prophylaxis of thromboembolic complications after the Fontan operation (total cavopulmonary anastomosis). J Thorac Cardiovasc Surg 2005; 129: 569-75.

E210. Stamm C, Friehs I, Duebener LF, et al. Improving results of the modified Fontan operation in patients with heterotaxy syndrome. Ann Thorac Surg 2002; 74: 1967-78.

E211. Naschitz JE, Slobodin G, Lewis RJ, et al. Heart diseases affecting the liver and liver diseases affecting the heart. Am Heart J 2000; 140: 111-20.

E212. Diller GP, Giardini A, Dimopoulos K, et al. Predictors of morbidity and mortality in contemporary Fontan patients: results from a multicenter study including cardiopulmonary exercise testing in 321 patients. Eur Heart J 2010; 31: 3073-83.

E213. Ghaferi AA, Hutchins GM. Progression of liver pathology in patients undergoing the Fontan procedure: chronic passive congestion, cardiac cirrhosis, hepatic adenoma, and hepatocellular carcinoma. J Thorac Cardiovasc Surg 2005; 129(6): 1348-1352.

E214. Camposilvan S, Milanesi O, Stellin G, et al. Liver and cardiac function in the long term after Fontan operation. Ann Thorac Surg 2008; 86: 177- 82.

E215. Duerinckx AJ, Grant EG, Perrella RR, et al. The pulsatile portal vein in cases of congestive heart failure: correlation of Duplex Doppler findings with right atrial pressures. Radiology 1990; 176: 655- 8.

E216. Hosoki T, Arisawa J, Marukawa T, et al. Portal blood flow in congestive heart failure: pulsed duplex sonographic findings. Radiology 1990; 174: 733- 6.

E217. Catalano D, Caruso G, Di Fazzio S, et al. Portal vein pulsatility ratio and heart failure. J Clin Ultrasound 1998; 26: 27-31.

E218. Rengo C, Brevetti G, Sorrentino G, et al. Portal vein pulsatility ratio provides a measure of right heart function in chronic heart failure. Ultrasound Med Biol 1998; 24: 327-32.

E219. Menon SC, Gray R, Tani LY. Evaluation of ventricular filling pressures and ventricular function by Doppler echocardiography in patients with functional single ventricle: correlation with simultaneous cardiac catheterization. J Am Soc Echocardiogr 2011; 24: 1220-1225.

E220. Tomkiewicz-Pajak L, Plazak W, Kolcz J, Pajak J, Kopec G, Dluzniewska N, Olszowska M, Moryl-Bujakowska A, Podolec P. Iron deficiency and hematological changes in adult patients after Fontan operation. J Cardiol 2014; 64: 384-389.

E221. Averin K, Hirsch R, Seckeler MD, Whiteside W, Beekman RH 3rd, Goldstein BH. Diagnosis of occult diastolic dysfunction late after the Fontan procedure using a rapid volume expansion technique. Heart. 2016; 102: 1109-1114.

E222. **Senzaki H, Masutani S, Kobayashi J, et al. Ventricular afterload and ventricular work in Fontan circulation: comparison with normal two-ventricle circulation and single-ventricle circulation with Blalock-Taussig shunts. Circulation 2002; 105: 2885-92.**

E223. Bae EJ, Lee JY, Noh CI, et al. Sinus node dysfunction after Fontan modifications - influence of surgical method. Int J Cardiol 2003; 88: 285-291.

E224. Barber G, Di Sessa T, Child JS, et al. Hemodynamic responses to isolated increments in heart rate by atrial pacing after a Fontan procedure. Am Heart J 1988; 115: 837-841.

E225. Poh CL, Chiletti R, Zannino D, Brizard C, Konstantinov IE, Horton S, Millar J, d’Udekem Y. Ventricular assist device support in patients with single ventricles: the Melbourne experience. Interact Cardiovasc Thorac Surg 2017; 25: 310-316.

E226. Poh CL, Zannino D, Weintraub RG, Winlaw DS, Grigg LE, Cordina R, Hornung T, Bullock A, Justo RN, Gentles TL, Verrall C, du Plessis K, Celermajer DS, d’Udekem Y. Three decades later: the fate of the population of patients who underwent the atriopulmonary Fontan procedure. Int J Cardiol 2017; 231: 99-104.

E227. Zomer AC, Vaartjes I, van der Velde ET, de Jong HM, Konings TC, Wagenaar LJ, Heesen WF, Eerens F, Baur LH, Grobbee DE, Mulder BJ. Heart failure admissions in adults with congenital heart disease; risk factors and prognosis. Int J Cardiol 2013; 168: 2487-2493.

E228. Atz AM, Zak V, Mahony L, Uzark K, D’agincourt N, Goldberg DJ, Williams RV, Breitbart RE, Colan SD, Burns KM, Margossian R, Henderson HT, Korsin R, Marino BS, Daniels K, McCrindle BW; Pediatric Heart Network Investigators. Longitudinal outcomes of patients with single ventricle after the Fontan procedure. J Am Coll Cardiol 2017; 69: 2735-2744.

E229. Anderson PAW, Sleeper LA, Mahony L, et al. Contemporary outcomes after the Fontan procedure. J Am Coll Cardiol 2008; 52: 85-98.

E230. Miller JR, Simpson KE, Epstein DJ, Lancaster TS, Henn MC, Schuessler RB, Balzer DT, Shahanavaz S, Murphy JJ, Canter CE, Eghtesady P, Boston US. Improved survival after heart transplant for failed Fontan patients with preserved ventricular function. J Heart Lung Transplant 2016; 35: 877-883.

E231. Griffiths ER, Kaza AK, Wyler von Ballmoos MC, Loyola H, Valente AM, Blume ED, del Nido P. Evaluating failing Fontans for heart transplantation: predictors of death. Ann Thorac Surg 2009; 88: 558-563.

E232. Rathod RH, Prakash A, Kim YY, Germanakis IE, Powell AJ, Gauvreau K, Geva T. Cardiac magnetic resonance parameters predict transplantationfree survival in patients with Fontan circulation. Circ Cardiovasc Imaging 2014; 7: 502-509.

E233. Rathod RH, Prakash A, Powell AJ, Geva T. Myocardial fibrosis identified by cardiac magnetic resonance late gadolinium enhancement is associated with adverse ventricular mechanics and ventricular tachycardia late after Fontan operation. J Am Coll Cardiol 2010; 55: 1721-1728.

E234. Garofalo CA, Cabreriza SE, Quinn TA, Weinberg AD, Printz BF, Hsu DT, Quaegebeur JM, Mosca RS, Spotnitz HM. Ventricular diastolic stiffness predicts perioperative morbidity and duration of pleural effusions after the Fontan operation. Circulation. 2006; 114(suppl): I56-I61.

E235. De Mey W, Cools B, Heying R, Budts W, Louw JJ, Boshoff DE, Brown SC, Gewillig M. Can a volume challenge pinpoint the limiting factor in a Fontan circulation? Acta Cardiol 2015; 70: 536-542.

E236. Caruthers RL, Kempa M, Loo A, Gulbransen E, Kelly E, Erickson SR, Hirsch JC, Schumacher KR, Stringer KA. Demographic characteristics and estimated prevalence of Fontan-associated plastic bronchitis. Pediatr Cardiol 2013; 34: 256-261.

E237. Ezmigna DR, Morgan WJ, Witte MH, Brown MA. Lymphoscintigraphy in plastic bronchitis, a pediatric case report. Pediatr Pulmonol 2013; 48: 515-518.

E238. Dori Y, Zviman MM, Itkin M. Dynamic contrast-enhanced MR lymphangiography: feasibility study in swine. Radiology 2014; 273: 410-416.

E239. Arcidi JM Jr, Moore GW, Hutchins GM. Hepatic morphology in cardiac dysfunction: a clinicopathologic study of 1000 subjects at autopsy. Am J Pathol 1981; 104: 159-166.

E240. Ghaferi AA, Hutchins GM. Progression of liver pathology in patients undergoing the Fontan procedure: chronic passive congestion, cardiac cirrhosis, hepatic adenoma, and hepatocellular carcinoma. J Thorac Cardiovasc Surg 2005; 129: 1348-1352.

E241. Agnoletti G, Ferraro G, Bordese R, Marini D, Gala S, Bergamasco L, Ferroni F, Calvo PL, Barletti C, Cisarò F, Longo F, Pace Napoleone C. Fontan circulation causes early, severe liver damage: should we offer patients a tailored strategy? Int J Cardiol 2016; 209: 60-65.

E242. DiPaola FW, Schumacher KR, Goldberg CS, Friedland-Little J, Parameswaran A, Dillman JR. Effect of Fontan operation on liver stiffness in children with single ventricle physiology. Eur Radiol 2017; 27: 2434-2442.

E243. Goldberg CS, Lu M, Sleeper LA, Mahle WT, Gaynor JW, Williams IA, Mussatto KA, Ohye RG, Graham EM, Frank DU, Jacobs JP, Krawczeski C, Lambert L, Lewis A, Pemberton VL, Sananes R, Sood E, Wechsler SB, Bellinger DC, Newburger JW; Pediatric Heart Network Investigators. Factors associated with neurodevelopment for children with single ventricle lesions. J Pediatr 2014; 165: 490-496.e8.

E244. Goldberg CS, Schwartz EM, Brunberg JA, Mosca RS, Bove EL, Schork MA, Stetz SP, Cheatham JP, Kulik TJ. Neurodevelopmental outcome of patients after the Fontan operation: a comparison between children with hypoplastic left heart syndrome and other functional single ventricle lesions. J Pediatr 2000; 137: 646-652.

E245. Goldberg DJ, Dodds K, Avitabile CM, Glatz AC, Brodsky JL, Semeao EJ, Rand EB, Mancilla EE, Rychik J. Children with protein-losing enteropathy after the Fontan operation are at risk for abnormal bone mineral density. Pediatr Cardiol 2012; 33: 1264-1268.

E246. Goldberg DJ, Surrey LF, Glatz AC, Dodds K, O'Byrne ML, Lin HC, Fogel M, Rome JJ, Rand EB, Russo P, Rychik J. Hepatic fibrosis is universal following Fontan operation, and severity is associated with time from surgery: a liver biopsy and hemodynamic study. J Am Heart Assoc 2017; 6: e004809.

E247. Goldberg DJ, Zak V, Goldstein BH, Chen S, Hamstra MS, Radojewski EA, Maunsell E, Mital S, Menon SC, Schumacher KR, Payne RM, Stylianou M, Kaltman JR, deVries TM, Yeager JL, Paridon SM; Pediatric Heart Network Investigators. Results of a p**has**e I/II multi-center investigation of udenafil in adolescents after Fontan palliation. Am Heart J 2017; 188: 42-52.

E248. Goldberg DJ, Zak V, Goldstein BH, McCrindle BW, Menon SC, Schumacher KR, Payne RM, Rhodes J, McHugh KE, Penny DJ, Trachtenberg F, Hamstra MS, Richmond ME, Frommelt PC, Files MD, Yeager JL, Pemberton VL, Stylianou MP, Pearson GD, Paridon SM; Pediatric Heart Network Investigators. Design and rationale of the Fontan Udenafil Exercise Longitudinal (FUEL) trial. Am Heart J 2018; 201: 1-8.

E249. Egbe A, Khan AR, Al-Otaibi M, Said SM, Connolly HM. Outcomes of hospitalization in adults with Fontan palliation: the Mayo Clinic experience. Am Heart J. 2018; 198: 115-122.

E250. Egbe A, Miranda WR, Connolly HM, Khan AR, Al-Otaibi M, Venkatesh SK, Simonetto D, Kamath P, Warnes C. Temporal changes in liver stiffness after Fontan operation: results of serial magnetic resonance elastography. Int J Cardiol 2018; 258: 299-304.

E251. Egbe AC, Connolly HM, Khan AR, Niaz T, Said SS, Dearani JA, Warnes CA, Deshmukh AJ, Kapa S, McLeod CJ. Outcomes in adult Fontan patients with atrial tachyarrhythmias. Am Heart J 2017; 186: 12-20.

E252. Egbe AC, Connolly HM, McLeod CJ, Ammash NM, Niaz T, Yogeswaran V, Poterucha JT, Qureshi MY, Driscoll DJ. Thrombotic and embolic complications associated with atrial arrhythmia after Fontan operation: role of prophylactic therapy. J Am Coll Cardiol 2016; 68: 1312-1319.

E253. Egbe AC, Driscoll DJ, Khan AR, Said SS, Akintoye E, Berganza FM, Connolly HM. Cardiopulmonary exercise test in adults with prior Fontan operation: the prognostic value of serial testing. Int J Cardiol 2017; 235: 6-10.

E254. Egbe AC, Khan AR, Ammash NM, Barbara DW, Oliver WC, Said SM, Akintoye E, Warnes CA, Connolly HM. Predictors of procedural complications in adult Fontan patients undergoing non-cardiac procedures. Heart 2017; 103: 1813-1820.

E255. Egbe AC, Poterucha JT, Warnes CA, Connolly HM, Baskar S, Ginde S, Clift P, Kogon B, Book WM, Walker N, Wagenaar L, Moe T, Oechslin E, Kay WA, Norris M, Gordon-Walker T, Dillman JR, Trout A, Anwar N, Hoskoppal A, Veldtman GR. Hepatocellular carcinoma after Fontan operation. Circulation 2018; 138: 746-748.

E256. Chen B, Schreiber RA, Human DG, Potts JE, Guttman OR. Assessment of liver stiffness in pediatric Fontan patients using transient elastography. Can J Gastroenterol Hepatol 2016; 2016: 7125193.

E257. Mueller S, Sandrin L. Liver stiffness: a novel parameter for the diagnosis of liver disease. Hepat Med 2010; 2: 49-67.

E258. Poterucha JT, Egbe AC, Johnson JN, Niaz T, Wackel PL, Cannon BC, Eidem BW, Cetta F. Improved ventricular function after TEE-guided cardioversion of atrial arrhythmias in patients after the Fontan operation. Congenit Heart Dis. 2016; 11: 578-583.

E259. Poterucha JT, Johnson JN, Qureshi MY, O’Leary PW, Kamath PS, Lennon RJ, Bonnichsen CR, Young PM, Venkatesh SK, Ehman RL, Gupta S, Smyrk TC, Dearani JA, Warnes CA, Cetta F. Magnetic resonance elastography: a novel technique for the detection of hepatic fibrosis and hepatocellular carcinoma after the Fontan operation. Mayo Clin Proc 2015; 90: 882-894.

E260. Poterucha JT, Johnson JN, Taggart NW, Cabalka AK, Hagler DJ, Driscoll DJ, Cetta F. Embolization of veno-venous collaterals after the Fontan operation Is associated with decreased survival. Congenit Heart Dis 2015; 10: E230-E236.

E261. Kolbe AB, Podberesky DJ, Zhang B, Towbin AJ. The impact of hepatocyte p**has**e imaging from infancy to young adulthood in patients with a known or suspected liver lesion. Pediatr Radiol 2015; 45: 354-365.

E262. Gelatt M, Hamilton RM, McCrindle BW, Gow RM, Williams WG, Trusler GA, Freedom RM. Risk factors for atrial tachyarrhythmias after the Fontan operation. J Am Coll Cardiol 1994; 24: 1735-1741.

E263. Pundi K, Pundi KN, Kamath PS, Cetta F, Li Z, Poterucha JT, Driscoll DJ, Johnson JN. Liver disease in patients after the Fontan operation. Am J Cardiol 2016; 117: 456-460.

E264. Pundi KN, Johnson JN, Dearani JA, Pundi KN, Li Z, Hinck CA, Dahl SH, Cannon BC, O’Leary PW, Driscoll DJ, Cetta F. 40-Year follow-up after the Fontan operation: long-term outcomes of 1,052 patients. J Am Coll Cardiol 2015; 66: 1700-1710.

E265. Pundi KN, Pundi KN, Johnson JN, Dearani JA, Li Z, Driscoll DJ, Wackel PL, McLeod CJ, Cetta F, Cannon BC. Sudden cardiac death and late arrhythmias after the Fontan operation. Congenit Heart Dis 2017; 12: 17-23.

E266. Nakamura Y, Yagihara T, Kagisaki K, et al. Ventricular performance in long-term survivors after Fontan operation. Ann Thorac Surg 2011; 91: 172e80.

E267. Ohye RG, Gomez CA, Goldberg CS, Graves HL, Devaney EJ, Bove EL. Tricuspid valve repair in hypoplastic left heart syndrome. J Thorac Cardiovasc Surg 2004; 127: 465-472.

E268. Ohye RG, Schranz D, D’Udekem Y. Current therapy for hypoplastic left heart syndrome and related single ventricle lesions. Circulation 2016; 134: 1265-1279.

E269. Ohye RG, Sleeper LA, Mahony L, Newburger JW, Pearson GD, Lu M, Goldberg CS, Tabbutt S, Frommelt PC, Ghanayem NS, Laussen PC, Rhodes JF, Lewis AB, Mital S, Ravishankar C, Williams IA, Dunbar-Masterson C, Atz AM, Colan S, Minich LL, Pizarro C, Kanter KR, Jaggers J, Jacobs JP, Krawczeski CD, Pike N, McCrindle BW, Virzi L, Gaynor JW; Pediatric Heart Network Investigators. Comparison of shunt types in the Norwood procedure for single-ventricle lesions. N Engl J Med 2010; 362: 1980-1992.

E270. Taka**has**hi K, Fynn-Thompson F, Cecchin F, Khairy P, del Nido P, Triedman JK. Clinical outcomes of Fontan conversion surgery with and without associated arrhythmia intervention. Int J Cardiol 2009; 137: 260-266.

E271. Taka**has**hi K, Inage A, Rebeyka IM, Ross DB, Thompson RB, Mackie AS, Smallhorn JF. Real-time 3-dimensional echocardiography provides new insight into mechanisms of tricuspid valve regurgitation in patients with hypoplastic left heart syndrome. Circulation 2009; 120: 1091-1098.

E272. Avitabile CM, Goldberg DJ, Zemel BS, Brodsky JL, Dodds K, Hayden-Rush C, Whitehead KK, Goldmuntz E, Rychik J, Leonard MB. Deficits in bone density and structure in children and young adults following Fontan palliation. Bone 2015; 77: 12-16.

E273. Avitabile CM, Leonard MB, Brodsky JL, Whitehead KK, Ravishankar C, Cohen MS, Gaynor JW, Rychik J, Goldberg DJ. Usefulness of insulin like growth factor 1 as a marker of heart failure in children and young adults after the Fontan palliation procedure. Am J Cardiol 2015; 115: 816-820.

E274. Avitabile CM, Leonard MB, Zemel BS, Brodsky JL, Lee D, Dodds K, Hayden-Rush C, Whitehead KK, Goldmuntz E, Paridon SM, Rychik J, Goldberg DJ. Lean mass deficits, vitamin D status and exercise capacity in children and young adults after Fontan palliation. Heart 2014; 100: 1702-1707.

E275. Cohen MI, Bush DM, Ferry RJ Jr, Spray TL, Moshang T Jr, Wernovsky G, Vetter VL. Somatic growth failure after the Fontan operation. Cardiol Young 2000; 10: 447-457.

E276. **Cohen MI, Rhodes LA, Wernovsky G, Gaynor JW, Spray TL, Rychik J. Atrial pacing: An alternative treatment for protein losing enteropathy after the Fontan operation. J Thorac Cardiovasc Surg 2001; 121: 582-3.**

E277. Vogt KN, Manlhiot C, Van Arsdell G, Russell JL, Mital S, McCrindle BW. Somatic growth in children with single ventricle physiology impact of physiologic state. J Am Coll Cardiol 2007; 50: 1876-1883.

E278. Cordina R, du Plessis K, Tran D, d’Udekem Y. Super-Fontan: is it possible? J Thorac Cardiovasc Surg 2018; 155: 1192-1194.

E279. Cordina R, O’Meagher S, Gould H, Rae C, Kemp G, Pasco JA, Celermajer DS, Singh N. Skeletal muscle abnormalities and exercise capacity in adults with a Fontan circulation. Heart. 2013; 99: 1530-1534.

E280. Cordina RL, O’Meagher S, Karmali A, Rae CL, Liess C, Kemp GJ, Puranik R, Singh N, Celermajer DS. Resistance training improves cardiac output, exercise capacity and tolerance to positive airway pressure in Fontan physiology. Int J Cardiol 2013; 168: 780-788.

E281. Mancilla EE, Zielonka B, Brodsky J, Roizen J, Zemel B, Goldberg DJ, Dodds KM, Rychik J. Growth parameters, bone mineral density and secondary hyperparathyroidism after Fontan operation: results from the Multidisciplinary Clinic at the CHOP Single Ventricle Survivorship Program. Circulation 2016; 134: A19714. Abstract 19714.

E282. Morsy MS, Dishmon DA, Garg N, Weber KT. Secondary hyperparathyroidism in heart failure. Am J Med Sci 2017; 354: 335-338.

E283. Freud LR, Webster G, Costello JM, Tsao S, Rychlik K, Backer CL, Deal BJ. Growth and obesity among older single ventricle patients presenting for Fontan conversion. World J Pediatr Congenit Heart Surg 2015; 6: 514-520.

E284. Pinto NM, Marino BS, Wernovsky G, de Ferranti SD, Walsh AZ, Laronde M, Hyland K, Dunn SO Jr, Cohen MS. Obesity is a common comorbidity in children with congenital and acquired heart disease. Pediatrics 2007; 120: e1157-e1164.

E285. Wellnitz K, Harris IS, Sapru A, Fineman JR, Radman M. Longitudinal development of obesity in the post-Fontan population. Eur J Clin Nutr 2015; 69: 1105-1108.

E286. GBD 2015 Obesity Collaborators, Afshin A, Forouzanfar MH, Reitsma MB, Sur P, Estep K, Lee A, Marczak L, Mokdad AH, et al. Health effects of overweight and obesity in 195 countries over 25 years. N Engl J Med 2017; 377: 13-27.

E287. Algaze CA, Koth AM, Faberowski LW, Hanley FL, Krawczeski CD, Axelrod DM. Acute kidney injury in patients undergoing the extracardiac Fontan operation with and without the use of cardiopulmonary bypass. Pediatr Crit Care Med 2017; 18: 34-43.

E288. Lee D, Levin A, Kiess M, Sexsmith G, Chakrabarti S, Barlow A, Human D, Grewal J. Chronic kidney damage in the adult Fontan population. Int J Cardiol 2018; 257: 62-66.

E289. Sharma S, Ruebner RL, Furth SL, Dodds KM, Rychik J, Goldberg DJ. Assessment of kidney function in survivors following Fontan palliation. Congenit Heart Dis 2016; 11: 630-636.

E290. Burke JR, Glasgow EF, McCredie DA, Powell HR. Nephropathy in cyanotic congenital heart disease. Clin Nephrol 1977; 7: 38-42.

E291. Perloff JK, Latta H, Barsotti P. Pathogenesis of the glomerular abnormality in cyanotic congenital heart disease. Am J Cardiol 2000; 86: 1198-1204

E292. Ohuchi H, Ikado H, Noritake K, Miyazaki A, Yasuda K, Yamada O. Impact of central venous pressure on cardiorenal interactions in adult patients with congenital heart disease after biventricular repair. Congenit Heart Dis 2013; 8: 103-110.

E293. Ohuchi H, Miyazaki A, Negishi J, Hayama Y, Nakai M, Nishimura K, Ichikawa H, Shiraishi I, Yamada O. Hemodynamic determinants of mortality after Fontan operation. Am Heart J 2017; 189: 9-18.

E294. Ohuchi H, Negishi J, Hayama Y, Miyazaki A, Shiraishi I, Ichikawa H. Renal resistive index reflects Fontan pathophysiology and predicts mortality. Heart 2017; 103: 1631-1637.

E295. Sarajuuri A, Jokinen E, Mildh L, Tujulin AM, Mattila I, Valanne L, Lönnqvist T. Neurodevelopmental burden at age 5 years in patients with univentricular heart. Pediatrics 2012; 130: e1636-e1646.

E296. Sarajuuri A, Jokinen E, Puosi R, Eronen M, Mildh L, Mattila I, Valanne L, Lönnqvist T. Neurodevelopmental and neuroradiologic outcomes in patients with univentricular heart aged 5 to 7 years: related risk factor analysis. J Thorac Cardiovasc Surg 2007; 133: 1524-1532.

E297. Watson CG, Stopp C, Wypij D, Newburger JW, Rivkin MJ. Reduced cortical volume and thickness and their relationship to medical and operative features in post-Fontan children and adolescents. Pediatr Res 2017; 81: 881-890.

E298. du Plessis AJ, Chang AC, Wessel DL, Lock JE, Wernovsky G, Newburger JW, Mayer JE Jr. Cerebrovascular accidents following the Fontan operation. Pediatr Neurol 1995; 12: 230-236.

E299. du Plessis K, Peters R, King I, Robertson K, Mackley J, Maree R, Stanley T, Pickford L, Rose B, Orchard M, Stewart H, d’Udekem Y. “Will she live a long happy life?” Parents’ concerns for their children with Fontan circulation. Int J Cardiol Heart Vasc 2018; 18: 65-70.

E300. Moffitt TE, Arseneault L, Belsky D, Dickson N, Hancox RJ, Harrington H, Houts R, Poulton R, Roberts BW, Ross S, Sears MR, Thomson WM, Caspi A. A gradient of childhood self-control predicts health, wealth, and public safety. Proc Natl Acad Sci USA 2011; 108: 2693-2698.

E301. Wernovsky G, Stiles KM, Gauvreau K, Gentles TL, duPlessis AJ, Bellinger DC, Walsh AZ, Burnett J, Jonas RA, Mayer JE Jr, Newburger JW. Cognitive development after the Fontan operation. Circulation 2000; 102: 883-889.

E302. McMurray JJ, et al. Dual angiotensin receptor and neprilysin inhibition as an alternative to angiotensin-converting enzyme inhibition in patients with chronic systolic heart failure: rationale for and design of the prospective comparison of ARNI with ACEI to determine impact on global mortality and morbidity in heart failure trial (PARADIGM-HF). Eur J Heart Fail 2013; 15(9): 1062-1073.

E303. McMurray JJV, Adamopoulos S, Anker SD, Auricchio A, Böhm M, Dickstein K, et al. ESC Guidelines for the diagnosis and treatment of acute and chronic heart failure 2012. The Task Force for the Diagnosis and Treatment of Acute and Chronic Heart Failure 2012 of the European Society of Cardiology Developed in collaboration with the Heart Failure Association (HFA) of the ESC 2012; 33: 1787-847

E304. Yancy CW,M. Jessup, B. Bozkurt, J. Butler, Casey DE Jr., et al., ACCF/AHA guideline for the management of heart failure: a report of the American College of Cardiology Foundation/American Heart Association Task Force on practice guidelines, Circulation 2013 (128) (2013) e240-e327.

E305. Cheung YF, Penny DJ, Redington AN. Serial assessment of left ventricular diastolic function after Fontan procedure. Heart 2000; 83: 420-424.

E306. Australia & New Zealand Fontan Registry. Annual Report 2014. Melbourne, Victoria, Australia. 2015.

E307. Madej U, Myers K, Fruitman D. 054 Practice Variation in Medical Therapy With Angiotensin Converting Enzyme (ACE) Inhibitors in Single Ventricle Patients Post-Fontan Procedure. Can J Cardiol 28: S106.

E308. Wilson TG, d’Udekem Y, Winlaw DS, et al. Australian and New Zealand Fontan Registry. Hepatic and renal end-organ damage in the Fontan circulation: a report from the Australian and New Zealand Fontan Registry. Int J Cardiol 2018; 273: 100-107.

E309. Kouatli AA, Garcia JA, Zellers TM,Weinstein EM,Mahony L. Enalapril does not enhance exercise capacity in patients after Fontan procedure. Circulation 1997; 96: 1507-12.

E310. YimDL, Jones BO, Alexander PM, d’Udekem Y, Cheung MM. Effect of anti-heart failure therapy on diastolic function in children with single-ventricle circulations. Cardiol Young 2015; 25: 1293-9.

E311. Burchill LJ, Redington AN, Silversides CK, Ross HJ, Jimenez-Juan L, Mital S, et al. Renin-angiotensin-aldosterone system genotype and serum BNP in a contemporary cohort of adults late after Fontan palliation. Int J Cardiol 2015; 197: 209-15.

E312. Singh TP, Almond CS, Semigran MJ, Piercey G, Gauvreau K. Risk prediction for early in-hospital mortality following heart transplantation in the United States. Circ Heart Fail 2012; 5: 259-66.

E313. Francois K, Bove T, Panzer J, De Groote K, Vandekerckhove K, De Wilde H, et al. Univentricular heart and Fontan staging: analysis of factors impacting on body growth. European Journal of Cardio-thoracic Surgery: official journal of the European Association for Cardio-thoracic Surgery 2012; 41: e139-45.

E314. Heragu N, Mahony L. Is captopril useful in decreasing pleural drainage in children after modified Fontan operation? The American J Cardiol 1999; 84. 1109-A10.

E315. Lamberti JJ, Mainwaring RD, Spicer RL, Uzark KC, Moore JW. Factors influencing perioperative morbidity during palliation of the univentricular heart. Ann Thorac Surg 1995; 60: S550-3.

E316. Gupta A, Daggett C, Behera S, Ferraro M, Wells W, Starnes V. Risk factors for persistent pleural effusions after the extracardiac Fontan procedure. J Thorac Cardiovasc Surg 2004; 127: 1664-9.

E317. Lee K-J, Yoo S-J, Holtby H, Grant B, Mroczek D, Wong D, et al. Acute effects of the ACE inhibitor enalapril on the pulmonary, cerebral and systemic blood flow and resistance after the bidirectional cavopulmonary connection. Heart (British Cardiac Society) 2011; 97: 1343-8.

E318. Hsu DT, Zak V, Mahony L, Sleeper LA, Atz AM, Levine JC, Barker PC, Ravishankar C, McCrindle BW, Williams RV, Altmann K, Ghanayem NS, Margossian R, Chung WK, Border WL, Pearson GD, Stylianou MP, Mital S; for the Pediatric Heart Network Investigators. Enalapril in infants with single ventricle: results of a multicenter randomized trial. Circulation 2010; 122: 333-340.

E319. Ghelani SJ, Harrild DM, Gauvreau K, Geva T, Rathod RH. Comparison between echocardiography and cardiac magnetic resonance imaging in predicting transplant-free survival after the Fontan operation. Am J Cardiol 2015; 116: 1132-1138.

E320. Mahle WT, Clancy RR, Moss EM, Gerdes M, Jobes DR, Wernovsky G. Neurodevelopmental outcome and lifestyle assessment in school-aged and adolescent children with hypoplastic left heart syndrome. Pediatrics 2000; 105: 1082-1089.

E321. ItkinM, et al. Protein-losing enteropathy in patients with congenital heart disease. J Am Coll Cardiol 2017; 69(24): 2929-2937.

E322. Parikh K, Witte MH, Samson R, Teodori M, Carpenter JB, Lowe MC, Morgan W, Hardin C, Brown M, Naughton Y, Sinha S, Barber BJ. Successful treatment of plastic bronchitis with low fat diet and subsequent thoracic duct ligation in child with Fontan physiology. Lymphology 2012; 45: 47-52.

E323. McElhinney DB, Marshall AC, Lang P, Lock JE, Mayer JE Jr. Creation of a brachial arteriovenous fistula for treatment of pulmonary arteriovenous malformations after cavopulmonary anastomosis. Ann Thorac Surg 2005; 80: 1604-1609.

E324. Vyas H, Driscoll DJ, Cabalka AK, Cetta F, Hagler DJ. Results of transcatheter Fontan fenestration to treat protein losing enteropathy. Catheter Cardiovasc Interv. 2007; 69: 584-589.

E325. Vyas H, Driscoll DJ, Cetta F, Loftus CG, Connolly HM. Gastrointestinal bleeding and protein-losing enteropathy after the Fontan operation. Am J Cardiol. 2006; 98: 666-667.

**E326. Hebson C, Book W, Elder RW, et al. Frontiers in Fontan failure: A summary of conference proceedings. Congenit Heart Dis 2017; 12(1): 6-16.**

**E327. Kogon B, McConnell M, Book W. Fontan conversion with hepatic vein exclusion: a means for hepatic preservation in single ventricle heart disease. Cardiol Young. 2016; 26(3): 582‐585.**

**E328. Marsden AL, Bernstein AJ, Reddy VM, et al. Evaluation of a novel Y‐shaped extracardiac Fontan baffle using computational fluid dynamics. J Thorac Cardiovasc Surg. 2009;137(2):394‐403.**

**E329. Marsden AL, Reddy VM, Shadden SC, et al. A new multiparameter approach to computational simulation for Fontan assessment and redesign. Congenit Heart Dis 2010; 5: 104-117.**

**E330. Booth KL, Roth SJ, Thiagarajan RR, et al. Extracorporeal membrane oxygenation support of the Fontan and bidirectional Glenn circulations. Ann Thor Surgery 2004; 77:1341–8.**

**E331. Rood KL, Teele SA, Barrett CS, et al. Extracorporeal membrane oxygenation support after the Fontan operation. J Thor Cardiovasc Surg. 2011; 142:504–10.**

**E332. Aharon AS, Drinkwater DC Jr, Churchwell KB, et al. Extracorporeal membrane oxygenation in children after repair of congenital heart lesions. Ann Thorac Surg 2001;72:2095–2101.**

**E333. ECMO registry report. Ann Arbor: Extracorporeal Life Support Organization, July 2002.**

**E334. Klein MD, Shaheen KW, Whittlesey GC, et al. Extracorporeal membrane: oxygenation for the circulatory support of children after repair of congenital heart disease. J Thorac Cardiovasc Surg 1990;100:498–505.**

**E335. Mascio CE, Austin EH III, Jacobs JP, et al. Perioperative mechanical circulatory support in children: an analysis of the Society of Thoracic Surgeons Congenital Heart Surgery Database. J Thorac Cardiovasc Surg 2014; 147:658–64**

**E336. Anderson PA, Sleeper LA, Mahony L, et al. Contemporary outcomes after the Fontan procedure: a pediatric heart network multicenter study. J Am Coll Cardiol 2008; 52:85-98.**

**E337. Bacon MK, Gray SB, Schwartz SM, et al. Extracorporeal Membrane Oxygenation (ECMO) Support in Special Patient Populations—The Bidirectional Glenn and Fontan Circulations, 2018. doi: 10.3389/fped.2018.00299**

**E338. Thiagarajan RR, Laussen PC, Rycus PT, et al. Extracorporeal membrane oxygenation to aid cardiopulmonary resuscitation in infants and Children’s Hospital Boston. Circulation. 2007;116:1693-700.**

**E339. Weinstein S, Bello R, Pizarro C, et al. The use of the Berlin Heart EXCOR in patients with functional single ventricle. J Thorac Cardiovasc Surg 2014; 147: 697-704.**

**E340. Carlo WF, Villa CR, Lal AK, Morales DL. Ventricular assist device use in single ventricle congenital heart disease. Pediat Transplant 2017; 21: e13031.**

**E341. Cedars AM, Schumacher K, Kindel S, et al. The Fontan VAD Physiology Project (FVPP). J Heart Lung Transplant. 2020;39:S12–S13. doi: 10.1016/j.healun.2020.01.1131**

**E342. Villa CR, Morales DLS. The total artificial heart in end-stage congenital heart disease. Front Physiol 2017; 8:131.**

**E343. Woods RK, Ghanayem NS, Mitchell ME, et al. Mechanical circulatory support of the Fontan patient. Semin Thor Cardiovasc Surg Pediat Cardiac Surg Ann 2017; 20:20-7.**

**E344. Rossano JW, Lorts A, VanderPluym CJ, et al. Outcomes of pediatric patients supported with continuous-flow ventricular assist devices: A report from the Pediatric Interagency Registry for Mechanical Circulatory Support (Pedi-MACS). J Heart Lung Transplant 2016; 35: 585-590.**

**E345. Durham LA, Dearani JA, Burkhart HM, et al Application of computer modeling in systemic VAD support of failing Fontan physiology. World Journal for Pediatric and Congenital Heart Surgery 2011; 2(2): 243-248.**

**E346. VanderPluym CJ, Rebeyka IM, Ross DB, Buchholz H. The use of ventricular assist devices in pediatric patients with univentricular hearts. J Thorac Cardiovasc Surg 2011; 141: 588-90.**

**E347. VanderPluym CJ, Khoo NS, Rebeyka IM, Buchholz H. Unique case of total artificial cardiac support in failed Fontan circulation after cardiectomy: is continuous flow better than pulsatile flow? J Thorac Cardiovasc Surg 2013; 145: e62-3.**

**E348. Moosmann J, Dittrich S, Purbojo A, Cesnjevar R. RVAD implantation in a Fontan patient with protein-losing enteropathy as a bridge to transplant: Pretre modification. J Card Surg 2020; 1-4. DOI: 10.1111/jocs.14658**

**E349. Mauchley DC, Mitchell MB. Transplantation in the Fontan patient. Semin Thor Cardiovasc Surg Pediat Cardiac Surg Ann. (2015) 18:7–16.**

**E350. Kanter KR. Heart transplantation in children after a Fontan procedure: better than people think. Semin Thor Cardiovasc Surg Pediat Cardiac Surg Ann 2016; 19: 44-9.**

**E351. Pretre R, Haussler A, Bettex D, Genoni M. Right-sided univentricular cardiac assistance in a failing Fontan circulation. Ann Thorac Surg 2008; 86:1018–20.**

**E352. Niebler RA, Ghanayem NS, Shah TK, et al. Use of a HeartWare ventricular assist device in a patient with failed Fontan circulation. Ann Thorac Surg 2014; 97: e115–6.**

**E353. Halaweish I, Ohye RG, Si MS. Berlin heart ventricular assist device as a long-term bridge to transplantation in a Fontan patient with failing single ventricle. Pediatr Transplant 2015; 19: E193-5**

**E354. Adachi I, Williams E, Jeewa A, Elias B, McKenzie ED. Mechanically assisted Fontan completion: a new approach for the failing Glenn circulation due to isolated ventricular dysfunction. J Heart Lung Transplant 2016; 35: 1380-1.**

**E355. Imielski BR, Niebler RA, Kindel SJ, Woods RK. Heartware ventricular assist device implantation in patients with Fontan physiology. Artif Organs 2017; 41:40-6.**

**E356. Mascio CE. Unique cannulation technique and atrioventricular valve excision for HeartWare HVAD in the small Fontan patient. Operat Techniq Thorac Cardiovasc Surg 21, 2016. https://doi.org/10.1053/j.optechstcvs.2017.08.002**

**E357. Di Molfetta A, Ferrari G, Iacobelli R, et al. Concurrent use of continuous and pulsatile flow ventricular assist device on a Fontan patient: a simulation study. Artif Organs 2017; 41: 32–9.**

**E358. Derk G, Laks H, Biniwale R, Patel S, De LaCruz K, Mazor E, et al. Novel techniques of mechanical circulatory support for the right heart and Fontan circulation. Int J Cardiol. 2014;176:828-32.**

**E359. Giridharan GA, Ising M, Sobieski MA, et al. Cavopulmonary assist for the failing Fontan circulation: impact of ventricular function on mechanical support strategy. ASAIO J. (2014) 60:707–15.**

**E360. Ishigami S, Ohtsuki S, Tarui S, et al Intracoronary autologous cardiac progenitor cell transfer in patients with hypoplastic left heart syndrome: the TICAP prospective phase 1 controlled trial. Circ Res 2015; 116: 653-664.**

**E361. Tarui S, Ishigami S, Ousaka D, et al. Transcoronary infusion of cardiac progenitor cells in hypoplastic left heart syndrome: three-year follow-up of the transcoronary infusion of cardiac progenitor cells in patients with single-ventricle physiology (TICAP) trial. J Thorac Cardiovasc Surg 2015; 150: 1198-207.**

**E362. Parekkadan B, Milwid JM. Mesenchymal stemcells as therapeutics. Annu Rev Biomed Eng 2010; 12: 87-117.**

**E363. Langer R, Vacanti JP. Tissue engineering. Science 1993; 260: 920-6.**

**E364. Shinoka T, Matsumura G, Hibino N, et al. Midterm clinical result of tissue-engineered vascular autografts seeded with autologous bone marrow cells. J Thorac Cardiovasc Surg 2005; 129: 1330-8.**

**E365. Hibino N, Mcgillicuddy E, Matsumura G, et al. Late‐term results of tissue‐engineered vascular grafts in humans. J Thorac Cardiovasc Surg 2010; 139(2): 431‐6.**

**E366. Drews JD, et al. Spontaneous reversal of stenosis in tissue-engineered vascular grafts. Sci Transl Med 2020; 12(537).**

**E367. Drews JD, Miyachi H and Shinoka T. Tissue-engineered vascular grafts for congenital cardiac disease: clinical experience and current status. Trends Cardiovasc Med 2017; 27: 521-531.**

**E368. Lee OK, Kuo TK, Chen WM, Lee KD, Hsieh SL, Chen TH. Isolation of multipotent mesenchymal stem cells from umbilical cord blood. Blood 2004; 103: 1669-1675.**

**E369. Patterson JT, Gilliland T, Maxfield MW, et al. Tissue-engineered vascular grafts for use in the treatment of congenital heart disease: from the bench to the clinic and back again. Regenerative Medicine 2012; 7(3), 409–419.**

**E370. Park J, Anderson CW, Sewanan LR, et al. Modular design of a tissue engineered pulsatile conduit using human induced pluripotent stem cell-derived cardiomyocytes. Acta Biomater 2020;102:220–30.**

**E371. Biermann D, Eder A, Arndt F, Seoudy H, et al. Towards a tissue-engineered contractile Fontan-conduit: the Fate of cardiac myocytes in the subpulmonary circulation. PLoS One 2016;11:e0166963.**

**E372. Rodefeld MD, Frankel SH, Giridharan GA. Cavopulmonary assist: (em) powering the univentricular Fontan circulation. Semin Thorac Cardiovasc Surg Pediatr Card Surg Annu 2011; 14(1): 45–54.**

**E373. Ambastha C. Bittle GJ, Morales D, et al. Regenerative medicine therapy for single ventricle congenital heart disease. Transl. Pediatr. 2018, 7, 176–187.**

**E374. Qureshi MY, Cabalka AK, Khan SP, et al. Cell-based therapy for myocardial dysfunction after Fontan operation in hypoplastic left heart syndrome. Mayo Clin Proc Innov Qual Outcomes. (2017) 1:185–91.**

**E375. Brown JM, Nemeth K, Kushnir-Sukhov NM, et al. Bone marrow stromal cells inhibit mast cell function via a COX2-dependent mechanism. Clin Exp Allergy 2011; 41: 526–534.**

**E376. Ferrari G, Cusella-De Angelis G, et al. Muscle regeneration by bone marrow-derived myogenic progenitors. Science 1998; 279: 1528-1530.**

**E377. Avolio E, Rodriguez‐arabaolaza I, Spencer HL, et al. Expansion and characterization of neonatal cardiac pericytes provides a novel cellular option for tissue engineering in congenital heart disease. J Am Heart Assoc. 2015;4(6):e002043.**

**E378. Shimizu T, Yamato M, Isoi Y, et al. Fabrication of pulsatile cardiac tissue grafts using a novel 3-dimensional cell sheet manipulation technique and temperature-responsive cell culture surfaces. Circulation research 2002 22; 90(3): e40.**

**E379. Seta H, Matsuura K, Sekine H, et al. Tubular cardiac tissues derived from human induced pluripotent stem cells generate pulse pressure in vivo. Sci Rep 2017; 7: 45499.**

**E380. Chowdhury UK, Mishra PK, Sharma R, et al. Postoperative assessment of the univentricular repair by dynamic radionuclide studies. Ann Thorac Surg 2004; 78: 658-665.**

**Table E1: List of available treatment modalities for the “failing” and “failed” Fontan circulation**

| **Early Fontan failure**   - Rapid recognition and correction of any residual surgically correctable anatomic problems. - Terminate tachycardia - Other options: Fontan takedown to bi-directional Glenn / Fontan pathway fenestration / hemi-Fontan / extracorporeal membrane oxygenation or urgent cardiac transplantation - Ventricular assist device including Berlin heart- unsuitable optionE88-E90,E118 |
| --- |
| **Systemic ventricular dysfunction**   - Often refractory to medical therapy - Afterload reduction, beta blockers inotropesE52 - Acetylcholine esterase- inhibitory drugs46,E52 - Pulmonary vasodilatorsE175,E183-E185 - Calcium channel blockers for diastolic dysfunction - Multisite pacingE37-E39,E119 - Cardiac transplantationE88-E103,E107,E108 |
| **Ascites**   - In early Fontan failure- urgent correction of residual anatomic problems, if any - High risk Fontan- fenestration of Fontan pathway / Fontan takedown to an intermediate circulationE176 - Selected cases- Fontan conversion with arrhythmia surgery, dual chamber pacing20,21,E179 |
| **Lymphatic dysfunction**  *Protein losing enteropathy*   - Multi-nutritional support with protein, median chain triglyceride - Control supraventricular arrhythmias - Afterload reduction, diuretics, - Enteric steroids- oral budesonideE86,E170 - Unfractionated heparinE170,E171 - High dose aldactoneE171,E172,E173 - Intravenous albumin and gammaglobulin infusion - Immunosuppression and targeted pulmonary vasodilators- sildenafilE120,E125 - LoperamideE174 - Exclude Fontan pathway obstruction, - Other options- Atrial pacingE54, Fontan pathway fenestrationE176,E324 - Surgical ligation of the thoracic duct2,3,7,E175,E177 - Interruption of lympho-intestinal connectionsE321 - Cardiac transplantationE100,E107,E176,E184   *Plastic bronchitis*   - Urgent bronchial lavage using inhaled tissue plasminogen and vest therapy to mobilize bronchial castsE181,E182 - Pulmonary vasodilators, aldosterone inhibition, inhaled ileoprost E10,E11,E272-E274 - Percutaneous lymphatic interventions, embolization of lymphobronchial connectionE74,E238 - Surgical thoracic duct ligationE322 - Cardiac transplantationE184 |
| **Lungs**  *Pulmonary remodeling and rising pulmonary vascular resistance*   - Pulmonary vasodilatorsE175,E183-E185 - Inhaled ileoprostE10,E11 - Stenting of pulmonary arterial narrowing, if any |

**Table E2: List of available treatment modalities for the “failing” and “failed” Fontan circulation**

| **Pulmonary arteriovenous malformations**   - Options- percutaneous closure using gel foam coils - Surgical revision of the Fontan circuit to promote uniform blood flow to both lungs ensuring supply of hepatic factor - Cardiac transplantationE88-E103 - Lung transplantation for diffuse and extensive arteriovenous malformationsE180 - Creation of a brachial or axillary arteriovenous fistula to deliver the hepatic factor, and resolve pulmonary arteriovenous malformationsE323 |
| --- |
| **Cyanosis and collateral formation**   - Options- coil embolization of collaterals - Catheter-based occlusion of the fenestration or residual atrial septal defect9,17,46,E135-E137 - Classic Glenn with discontinuous pulmonary artery- restore continuity - Fontan conversion- selected cases of atriopulmonary connection9,17,20,21 |
| **Hepatic effects**   - Supportive care, optimize cardiac output - Pulmonary vasodilators and angiotensin-converting enzyme inhibitors - therapeutically potential benefit - Cardiac transplantation to reverse cirrhosis of liver, subclinical hepatic disease challenging post cardiac transplantationE49 - Failed Fontan with advanced cirrhosis of liver- cardiac and hepatic transplantationE149,E150,E178 |
| **Hepatorenal insufficiency**   - Supportive care - Optimise cardiac output - High mortality |
| **Fontan pathway obstruction, valve dysfunction, and outflow obstruction**   - Early repair of atrioventricular valves, left ventricular outflow tract obstruction on an individualized basis (Mavroudis, Honja, Kotani)5,6,E22,E37-E39 - Focal pulmonary artery stenosis/pulmonary venous obstruction- revision of Fontan pathway2-7,E186-E188 |
| **Thrombotic pathway obstruction**   - Early Fontan failure- Fontan takedown to an intermediate circulation, allograft replacement of systemic conduit using an allograftE186-E188 - Post-cardiac transplantation- problems of silently elevated pulmonary vascular resistance secondary to silent pulmonary microemboliE100 |

**Table E3: Flow diagram depicting the management algorithm for management of post Fontan supraventricular arrhythmias**

**(Deal BJ, 2007)**

**Acute/immediate evaluation**

- Achieve stable hemodynamics
- Control heart rate, antiarrhythmics (Beta blockers, Amiodarone)
- Terminate tachycardia
- Administer anticoagulation

Assess Fontan circulation

- Advanced imaging
- Hemodynamic evaluation
- Measure metabolic / electrolyte parameters

Intervene prior to ascites / protein losing enteropathy / thrombosis

| Atriopulmonary or Atrioventricular  **↓**  Fontan conversion and Arrhythmia surgery | Total cavopulmonary connection | |
| --- | --- | --- |
|  | Unstable hemodynamics  **↓**  Catheter or surgical interventions | Stable hemodynamics, unsuitable or high risk for arrhythmia surgery  **↓**  Catheter ablation |
|  |  |  |

**Surgical options**

- Fontan revision, pulmonary arteroplasty8,17-22,E137-E139,E179
- Fontan conversion to extracardiac Fontan circuit, appropriate modified Maze procedure, routine dual chamber pacing20,21
- Multisite pacing for dyskinetic systemic ventricles20,21

**Definitions (Electronics)**

**Fontan Failure**

Fontan failure **has** been variably and inconsistently described in the literature leading to challenges in comparing studies and evaluating treatments.8-12 Fontan failure is a clinical syndrome where circulation can no longer meet the metabolic demands of body, with symptoms of exercise intolerance with or without congestion resembling heart failure.8,9

The term ‘Failing Fontan’ refers to a clinical situation with major rhythm disturbances refractory to maximal medical therapy, thrombotic events in Fontan circuit, protein losing enteropathy, plastic bronchitis, chronic edema, ascites, cirrhosis, and ventricular failure.8-14 Intervention in failing Fontan may optimize clinical status while maintaining the Fontan circulation.8-16

The “failed Fontan” circulation includes hemodynamic or multiorgan system complications of Fontan circulation which are not reversible by surgical or catheter interventions at acceptable risk. Options for “failed Fontan” are limited to cardiac transplantation or attempts to minimize the impact of irreversible functional deterioration.9,17-21

Early Fontan failure is a postoperative state of low systemic perfusion characterized by high Fontan circuit pressures and large volume requirements, resistant to medical management necessitating the use of extra-corporeal membrane oxygenation, Fontan revision or takedown to an intermediate circulation, emergent cardiac transplantation within 30 days of Fontan procedure or death.15,16

Late Fontan failure may present insidiously over years. It is a failure of medical management to interpret the absence of overt symptoms or ascites as evidence of optimal hemodynamic status in the functionally univentricular circulation.2,9,19 The term ‘Fontan revision’ includes patients undergoing Fontan reoperations and address hemodynamic problems without arrhythmia surgery.17,20,21 The term ‘Fontan conversion’ accounts for the three major parts of new Fontan reoperation, namely, revision of atriopulmonary to extracardiac Fontan connections, atrial arrhythmia surgery, and pacemaker implantation.17,20,21
